# Supplementary material for: Detection of cell markers from single cell RNA-seq with sc2marker
Source: PubMed Central journal article supplement (PMC9281170; doi:10.1186/s12859-022-04817-5), 2022-07-12
Supplement: 12859_2022_4817_MOESM9_ESM.pdf [file 12859_2022_4817_MOESM9_ESM.pdf]

# Supplementary Figures: Detection of cell markers from single cell RNA-seq with sc2marker

May 2022

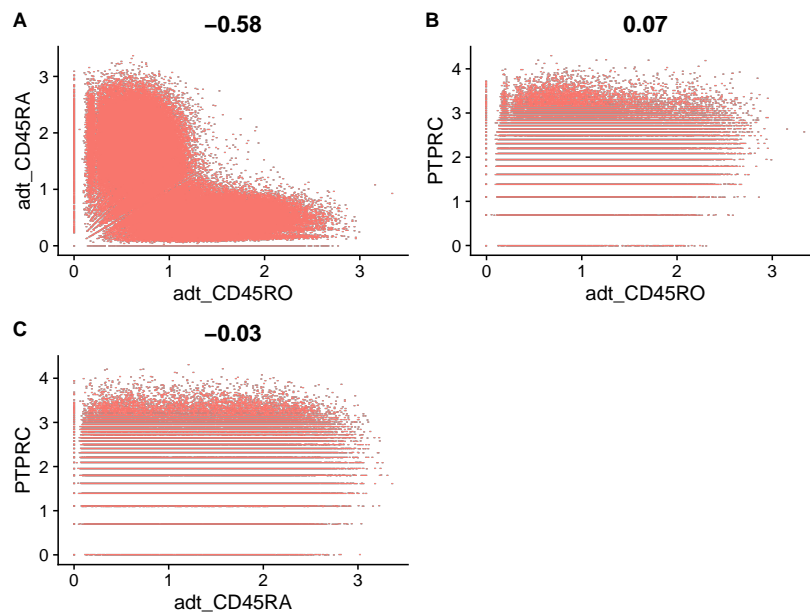

Figure 1: **Expression of CD45RA, CD45RO in Human-PBMC data.** Scatter plot of the gene PTPRC and the abundances of its two protein isoforms in Human-PBMC dataset: (A) CD45RA vs. CD45RO, (B) PTPRC vs. CD45RO, (C) PTPRC vs. CD45RA.

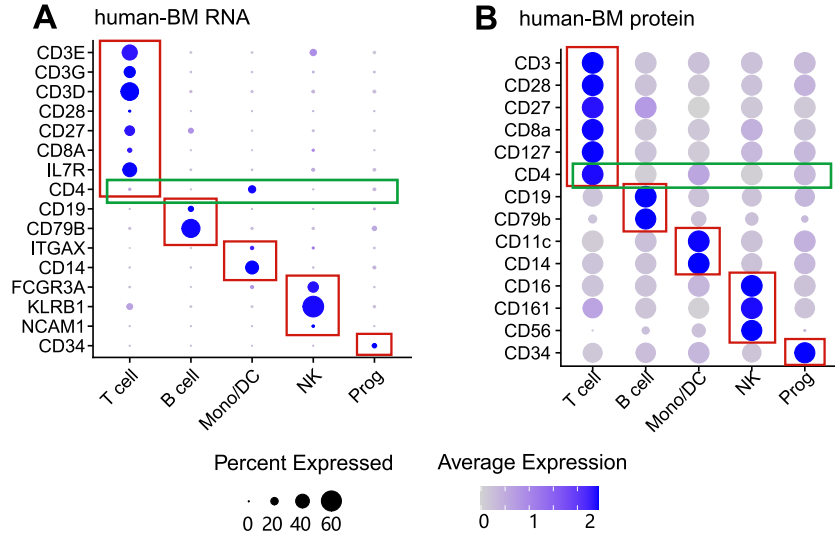

Figure 2: **Dot plot of RNA and protein modality of human-BM CITE-seq data.** Dot plot of markers used in Human-PBMC dataset ((A) RNA, (B) protein). We highlight the expression of CD4, which is a good marker for CD4 T cells in protein space, but not at RNA space.

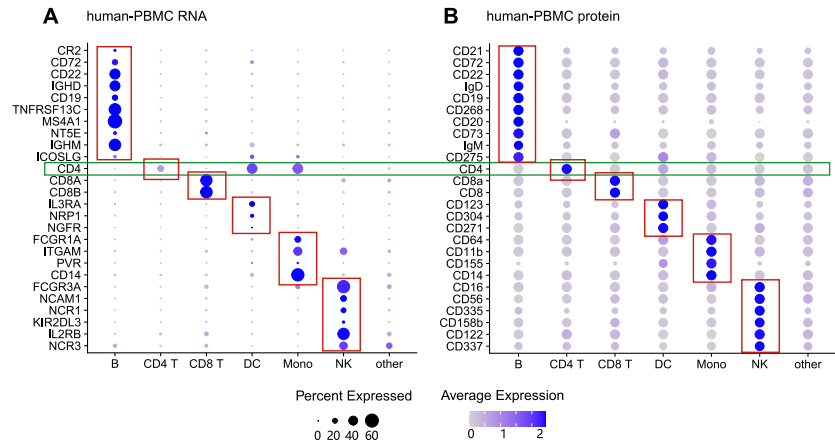

Figure 3: **Dot plot of RNA and protein modality of human-PBMC CITE-seq data.** Dot plot of markers used in Human-PBMC dataset. (A) RNA, (B) protein. We highlight the expression of CD4, which is a good marker for CD4 T cells in protein space, but not at RNA space.
